# Supplementary material for: Chemo-enzymatic synthesis of conformationally constrained oligosaccharides
Source: Royal Society of Chemistry journal article supplement (doi:10.1039/b308559g), 2003-01-01
Supplement: b308559g.doc [file b308559g.doc]

**SUPPLEMENTARY MATERIAL**

Chemo-Enzymatic Synthesis of Conformationally Constrained Oligosaccharides

M. Carmen Galan , *a*Andre P. Venot , *a* John Glushka , *a* Anne Imberty , *b* and Geert-Jan Boons**a*

##### NMR experiments

**
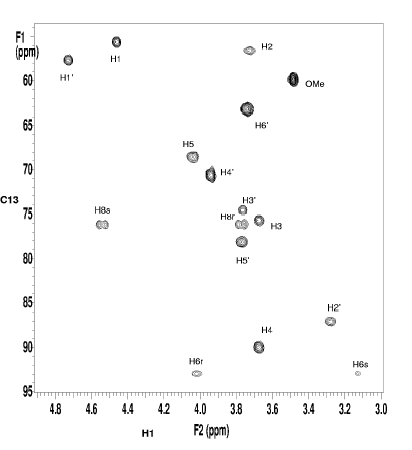
**

**Figure 1**. Region of 500 MHz H1{C13}-HSQC spectrum of compound **4** in D2O at 25oC. The anomeric signals, H1 and H1', and the H6 signals are folded in the carbon dimension; correct chemical shift values are found in Table 2 (main text).


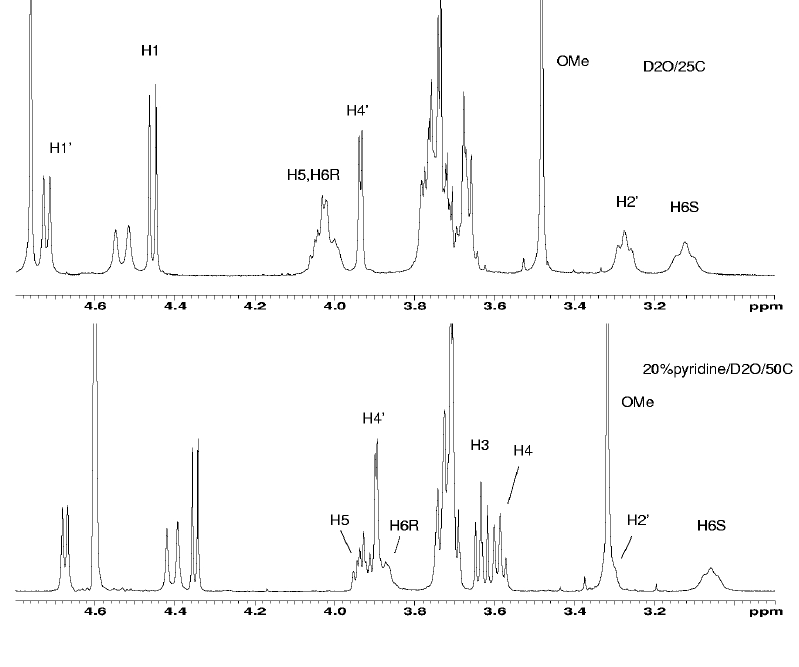


**Figure 2**. 600 MHz proton spectra of compound **4**. Top trace is D2O at 25oC; Bottom trace after adding 20% pyridine at 50oC. The chemical shift scale of the bottom trace is approximate.


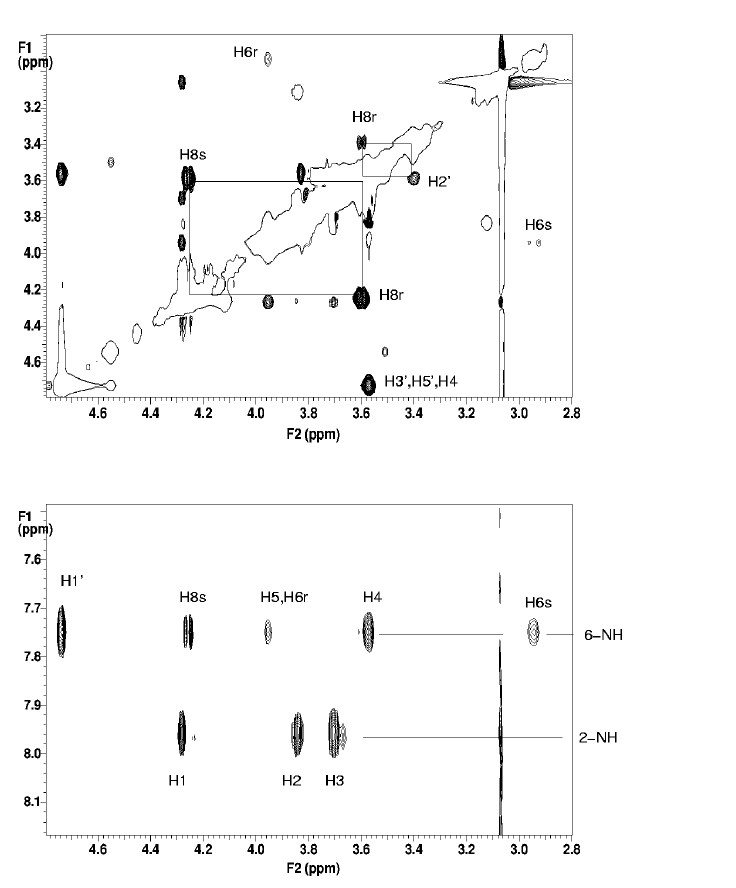


**Figure 3**. Regions of 800 MHz ROESY spectrum of compound **4** in 10% DMSO/pyridine, showing some observed NOEs. The lower panel shows crosspeaks between the 6-amide proton and other resonances. See text for discussion.


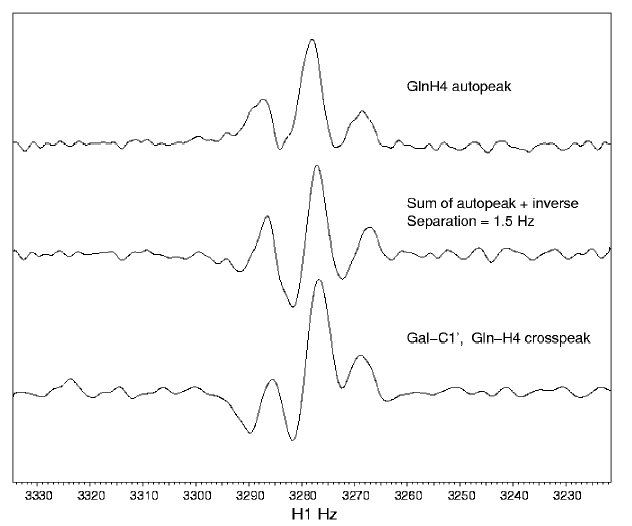


**Figure 4.** Determination of 3*J*C1'-H4 for compound **4**. Top: a trace through the C4-H4 autopeak in the 2D HSQMBC spectrum; Middle: sum of the above trace with its inverse, shifted by ~1.5 Hz; Bottom: trace through the C1'-H4 crosspeak in the 2D HSQMBC spectrum.

###### Molecular Mechanics Calculations

**Figure 5.** *Nomenclature*: Torsion angles at the glycosidic linkage have been defined with reference to the hydrogen atom: = H1'-C1'-O1'-C4,  = C1'-O1'-C4-H4. All other torsion angles are defined as indicated as follow. Galactoside atoms are primed and N, C7’ and C8’ belong to the linker.

**Table 1.** Characteristics of the conformational families that can be adopted by compound **4**. Only average values of torsion angles (°) are given for each family. Possible ranges for  and  are given in Figure **2** (main text). For the other torsion, variations in each families are less than +/- 20° around the average value.

|  | **Nb[a]** | **** | **** | **2** | **2** | **2** | **6** | **6** | **6** | **Erel[b]** |
| --- | --- | --- | --- | --- | --- | --- | --- | --- | --- | --- |
| Trans_ap | 28 | 40 | -30 | -50 | 65 | 45 | -170 | 95 | 170 | 0.0 |
| *Trans_p* | 38 | 23 | -45 | 93 | -65 | -37 | 174 | -75 | -155 | 0.3 |
| *Trans_p_2* | 17 | 60 | -20 | -30 | 70 | -115 | 171 | -65 | -165 | 3.3 |
| *Cis_p* | 2 | 30 | -5 | -75 | 60 | 60 | -5 | -130 | -75 | 3.6 |
| *Cis_ap* | 7 | 0 | -30 | 120 | -55 | -70 | 0 | 120 | 165 | 3.7 |

[a] Number of conformations obtained by clustering methods

[b] Relative energy (Kcal/mol) calculated after complete optimization of the lowest energy conformation of the family.

**Table 2.** Experimental and theoretical NMR data of the optimised 4.

|  | **NMR**  **pyridine/ D20** | **NMR pyridine/DMSO** | **Theoretical value** |
| --- | --- | --- | --- |
| **Coupling constants (Hz)** |  |  |  |
| **JH1'-C4** | 4.4 | Not measured | 4.5 |
| **JC1'-H4** | 1.5 | Not measured | 1.4 |
| **JH5'-H6 proR** | 5 | Not measured |  |
| **JH5'-H6 proS** | 10 | Not measured |  |
| **Proton distances (Å)** |  |  |  |
| **H1'-H4** | 2.3 | Not measured | 2.4 |
| **H1'-H3** | 3.0 | Not measured | 3.1 |
| **H2' – H8proR'** | N.O.a | Observed | 2.4 |
| **NH – H4** | N.O.b | Observed | 2.4 |
| **NH – H6proR** | N.O.b | Observed | 2.9 |
| **NH – H6 proS** | N.O.b | Observed | 2.4 |
| **NH – H1'** | N.O.b | Observed | 3.6 |
| **NH – H8proS'** | N.O.b | Observed | 2.6 |

N.O.a not observed due to signal overlap

N.O.b not observed due to NH proton exchange with D2O


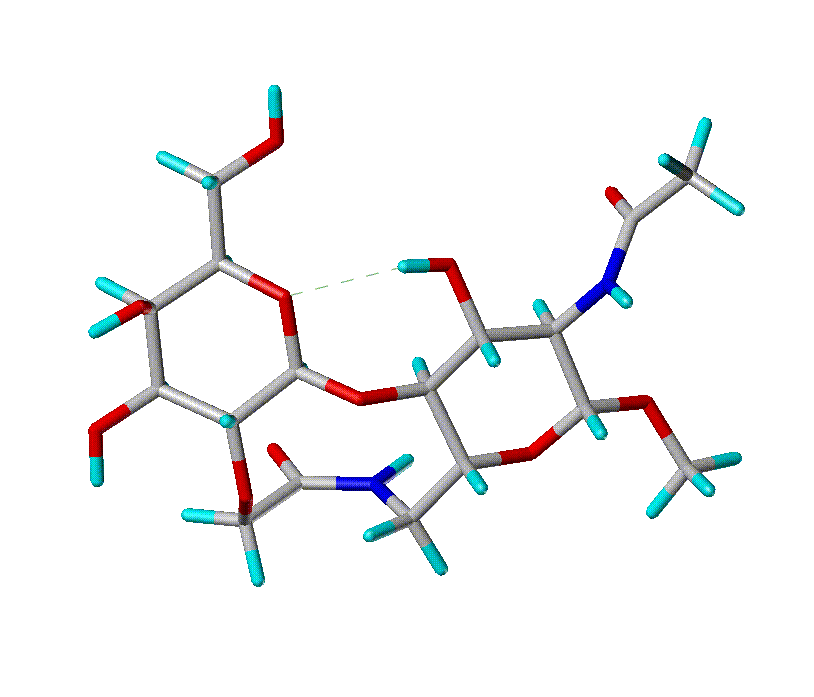

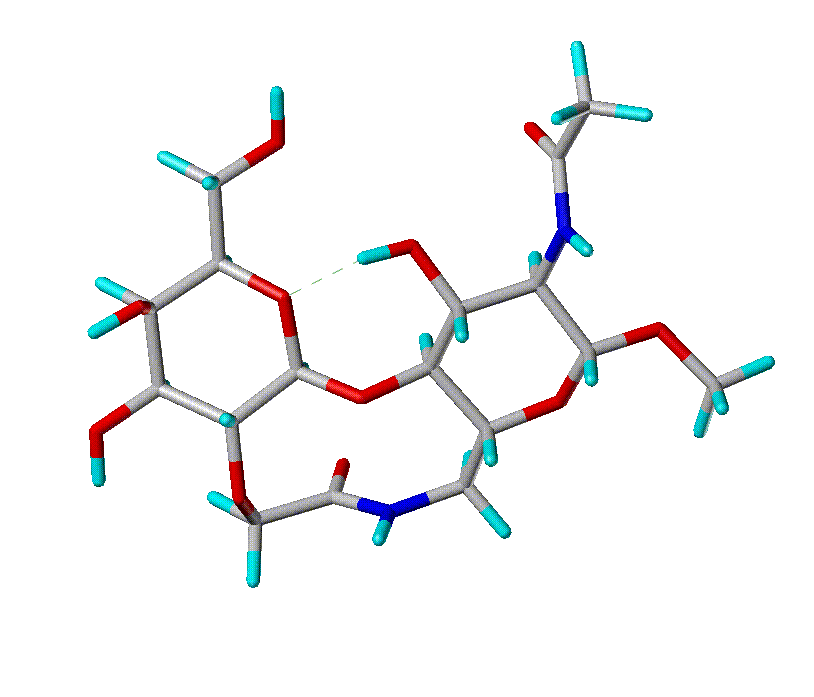

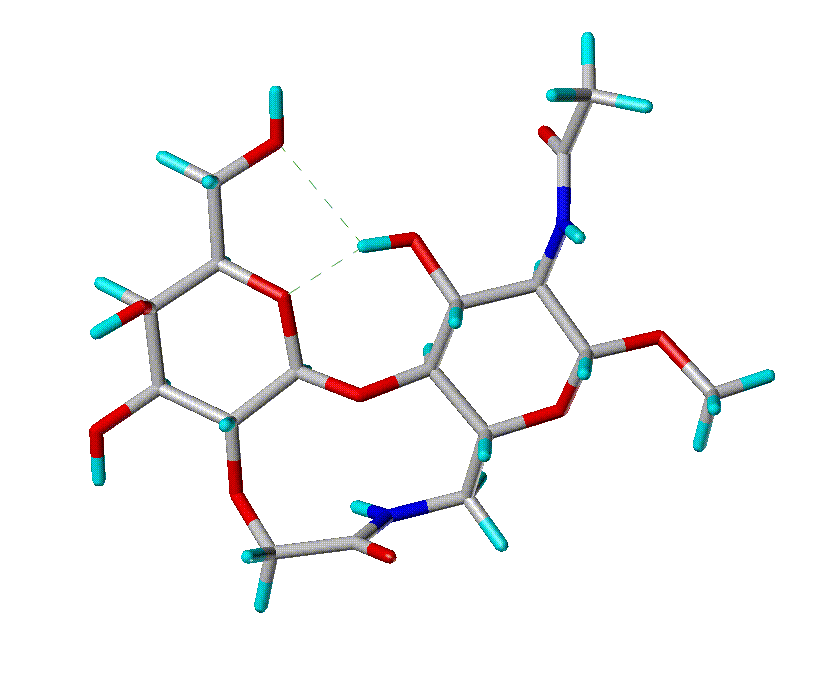

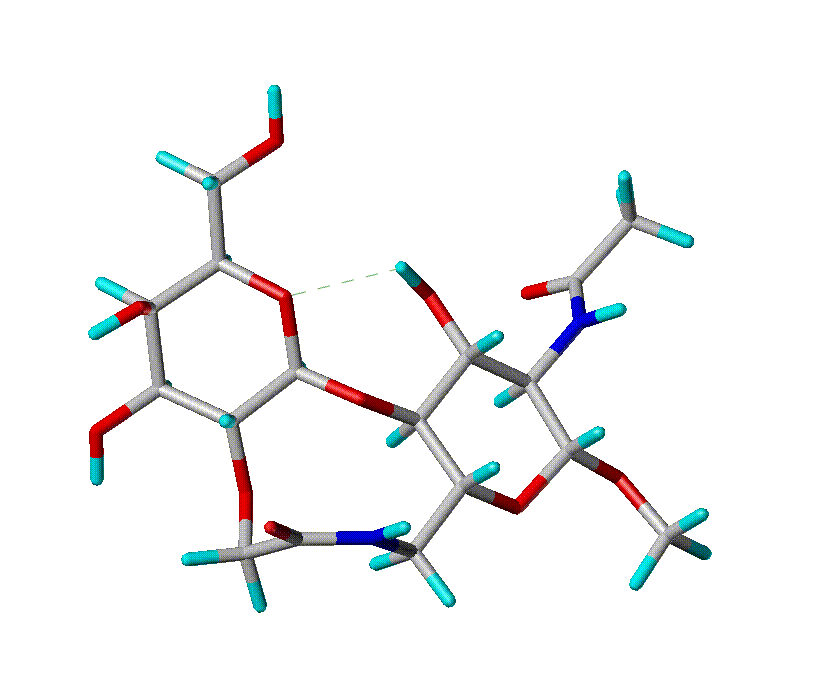


**Trans_p**

Trans_ap

**Cis_p**

Cis_ap

**Figure 6:** Low energy conformation of compound **4.**

**
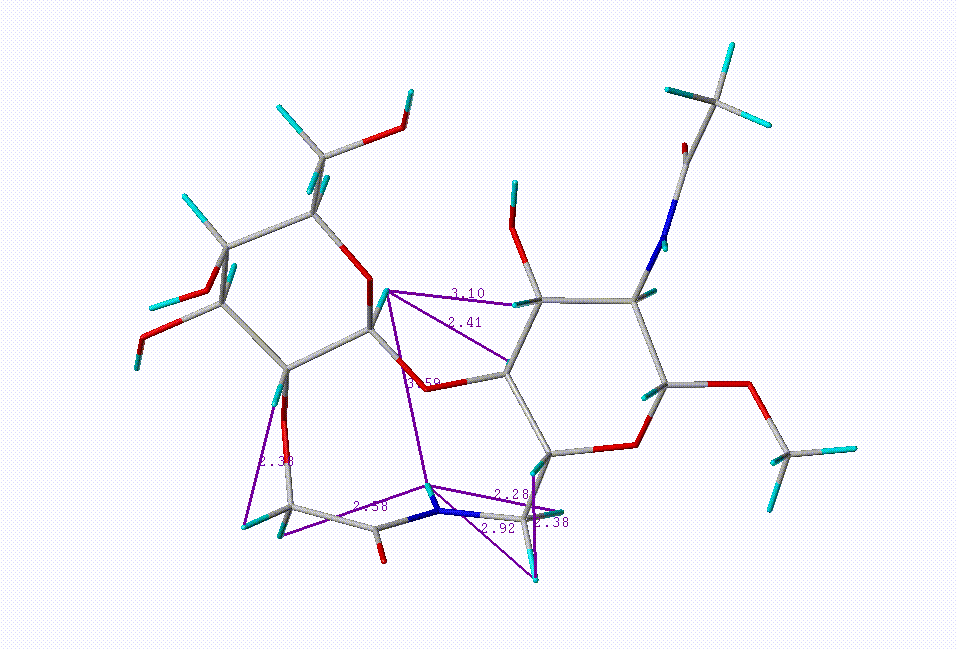
**

**Figure 7:** Low energy conformation of compound **4** together with proton distances of interest.

## Procedures for Enzyme Kinetics

*Sialyltransferase Assays*

Reported methods[1-4] were employed for assaying sialyltransferase activity. For studies of the relative rates, incubation mixtures contained CMP[14C]Neu5Ac (9 nmol, 6180 cpm/nmol) and substrate (120 nmol), bovine serum albumin (1mg/ml), 57 U of -2,6-Sialyltransferase in sodium cacodylate (50 mM, pH 6.5) containing 0.1% Triton X100 in a total volume of 60 L were incubated at 37 oC for a period of 30 min. The radiolabeled product was isolated using a procedure modified by Horenstein et al.[4] based on Paulson’s ion-exchange chromatography on a Dowex 1X8-200 (PO42-,100-200 mesh) Pasteur pipette column.[1] Columns (5 cm high) were eluted twice with 1 mM PO42- (4 mL) buffer to ensure that no radiolabeled product was left on the column.

Kinetic studies. Apparent kinetic parameters of the -2,6-ST for synthetic acceptor **4** was determined under the above standard conditions using a saturating concentration of CMP-[14C]Neu5Ac.[2] Assays were performed in duplicate using the appropriate amount of each of enzyme. The concentration of oligosaccharide acceptor was varied around the Km value (see supplementary material), whereas the concentration of CMP-[14C]Neu5Ac was kept constant at 200 M (1655 cpm/nmol). The time of incubation at 37oC was limited to 15 min. to limit the CMP-[14C]Neu5Ac consumption to 10–15 % to ensure initial rate conditions. The kinetic parameters Vmax and Km were determined using the GraphPad computer program obtained from Prism.

*Fucosyltransferase Assays*

Reported methods[2, 5] were employed for assaying fucosyltransferase activity. For studies of the relative rates, incubation mixtures contained GDP[14C]Fucose (2.3 nmol, 6532 cpm/nmol), substrate (150 nmol) and 50 U of FucT V assayed in sodium cacodylate (25 mM, pH 6.5) containing MnCl2 (8 mM), ATP (1.6 mM) and NaN3 (1.6 mM) in a total volume of 50 L were incubated at 37 oC for a period of 60 min. The radiolabeled product was isolated using ion-exchange chromatography on a Dowex 1X8-200 (Cl-,100-200 mesh) Pasteur pipette column.[5] Columns (2.5 cm high) were eluted twice with ice-cold water (1.5 mL) to ensure that no radiolabeled product was left on the column.

**References:**

[1]. Paulson, J. C., Rearick, J.I. and Hill, R.L. (1977) *J. Biol. Chem.* 252, 2363-2371.

[2]. Palcic, M.M.; Venot, A.P.; Ratcliffe, R.M. and Hindsgaul, O. (1989) *Carboh. Res.* 190, 1-11.

[3]. Wlasichuk, K. B., Kashem, M.; Nikrad, P.V.; Bird, P.; Jiang, C. and Venot, A.P. (1993) *J. Biol. Chem.* 268, 13971-13977.

[4]. Horenstein, B. A., and Bruner, M. (1998) *J. Am. Chem. Soc.* 120, 1357-1362.

[5]. de Vries, T., Srnka, C.A., Palcic, M.M., Sweidler, S.J., van den Eijnden, D.H. and Macher, B.A. (1995) *J. Biol. Chem.* 270, 8712.
